# Supplementary material for: Identification of a key gene module associated with glucocorticoid- induced derangement in bone mineral density in patients with asthma
Source: PubMed Central journal article supplement (PMC6934743; doi:10.1038/s41598-019-56656-9), 2019-12-27
Supplement: 41598_2019_56656_MOESM1_ESM.pdf [file 41598_2019_56656_MOESM1_ESM.pdf]

1 **Supplementary information**

2  
3 **Identification of a key gene module associated with glucocorticoid induced**  
4 **derangement in bone mineral density in patients with asthma**

5  
6 Suh-Young Lee, MD,<sup>1</sup> Ha-Kyeong Won, MD,<sup>1</sup> Byung-Keun Kim, MD,<sup>3</sup> Sae-Hoon  
7 Kim, MD, PhD,<sup>4</sup> Yoon-Seok Chang, MD, PhD,<sup>4</sup> Sang-Heon Cho, MD, PhD,<sup>1,2</sup> H.  
8 William Kelly, PharmD,<sup>5</sup> Kelan G. Tantisira, MD, MPH,<sup>6,7</sup> Heung-Woo Park, MD,  
9 PhD<sup>1,2,6</sup>

10  
11 <sup>1</sup>Department of Internal Medicine, Seoul National University College of Medicine,  
12 Seoul, Republic of Korea

13 <sup>2</sup>Institute of Allergy and Clinical Immunology, Seoul National University Medical  
14 Research Center, Seoul, Republic of Korea

15 <sup>3</sup>Department of Internal Medicine, Korea University Medical Center Anam Hospital,  
16 Seoul, Republic of Korea

17 <sup>4</sup>Department of Internal Medicine, Seoul National University Bundang Hospital,  
18 Seongnam, Gyeonggi-do, Republic of Korea

19 <sup>5</sup>Department of Pediatrics, University of New Mexico Health Sciences Center,  
20 Albuquerque, NM, USA

21 <sup>6</sup>The Channing Division of Network Medicine, Department of Medicine, Brigham and  
22 Women's Hospital, Harvard Medical School, Boston, MA, USA

23 <sup>7</sup>Division of Pulmonary and Critical Care Medicine, Department of Medicine, Brigham  
24 and Women's Hospital, Boston, MA, USA

25 **Figure S1. Assessing scale-free model fitting in gene expression profiles Sham-**  
26 **treated immortalized B cells from childhood asthmatics**

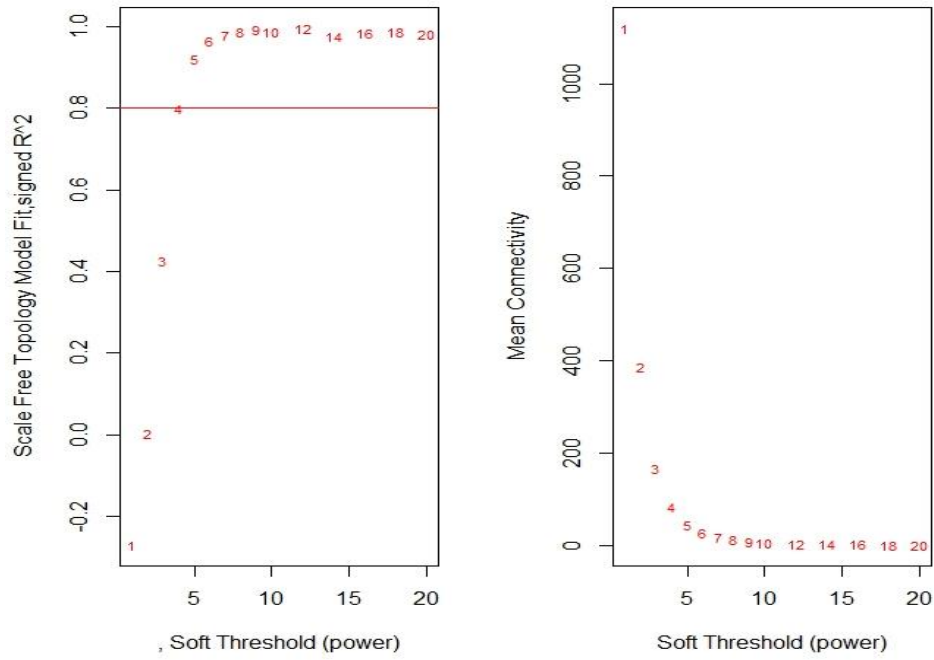

27  
28 Left panel shows scale-free topology plotted by soft threshold. The red horizontal line  
29 represents the cutoff for identifying a strong model fit. Right panel shows mean gene  
30 connectivity plotted by soft threshold.

31 **Figure S2. Correlations between eigengene values of two modules identified in gene**  
32 **expression profiles of Sham-treated immortalized B cells from childhood**  
33 **asthmatics and the bone mineral density Z score**  
34

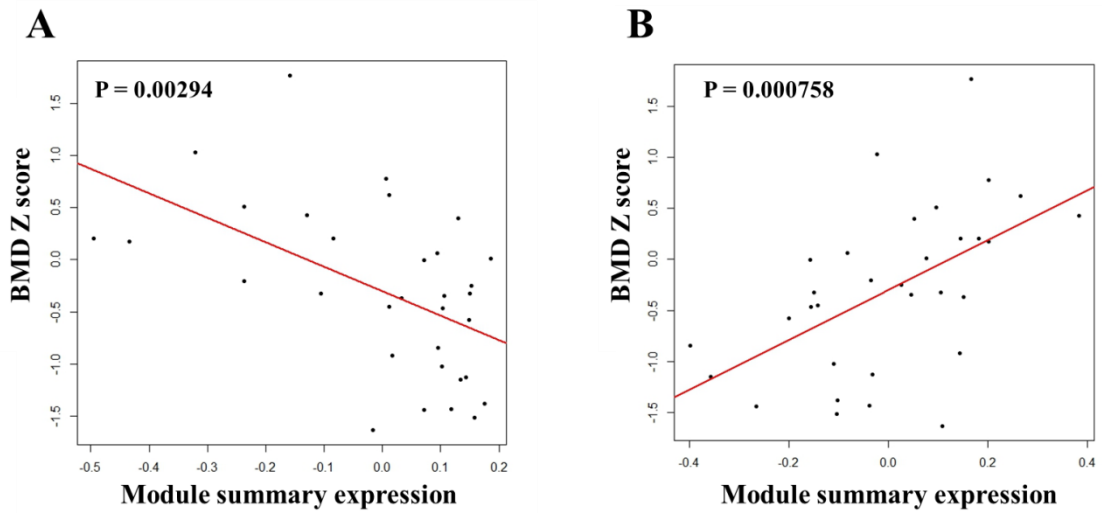

35  
36 A, Blue gene module; B, Magenta gene module  
37 All P values were adjusted by covariates.

38 **Figure S3. Scatter plot of module eigengenes in the magenta module (bone mineral**  
39 **density Z score-associated common module)**

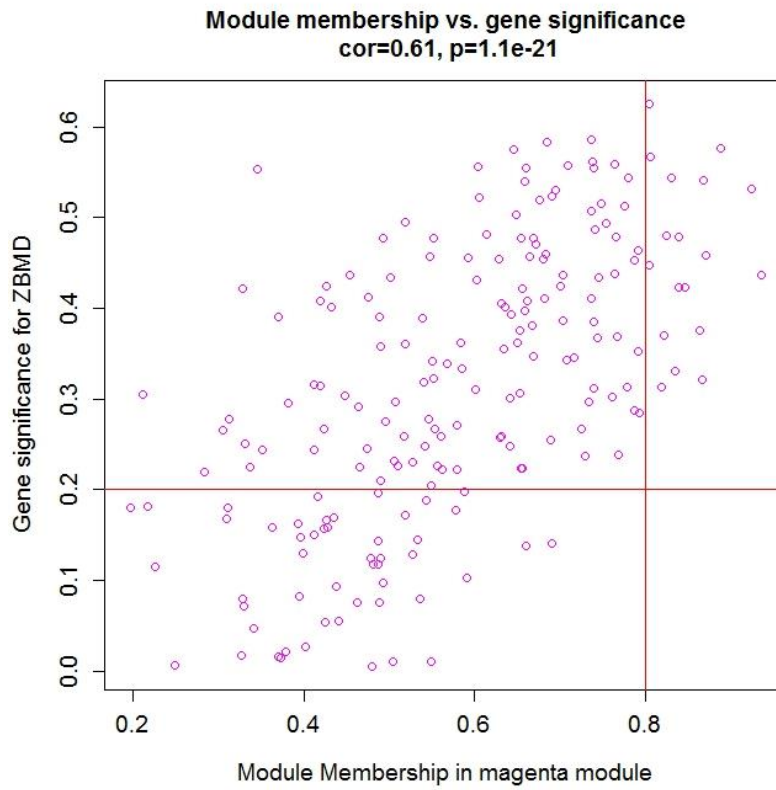

40

41 Hub genes are located at the right and upper quadrant.

42 **Figure S4. Preservation of modules identified in gene expression profiles of Sham-**  
43 **treated immortalized B cells from childhood asthmatics in gene expression profiles**  
44 **of Sham-treated osteoblast from GSE21727**  
45

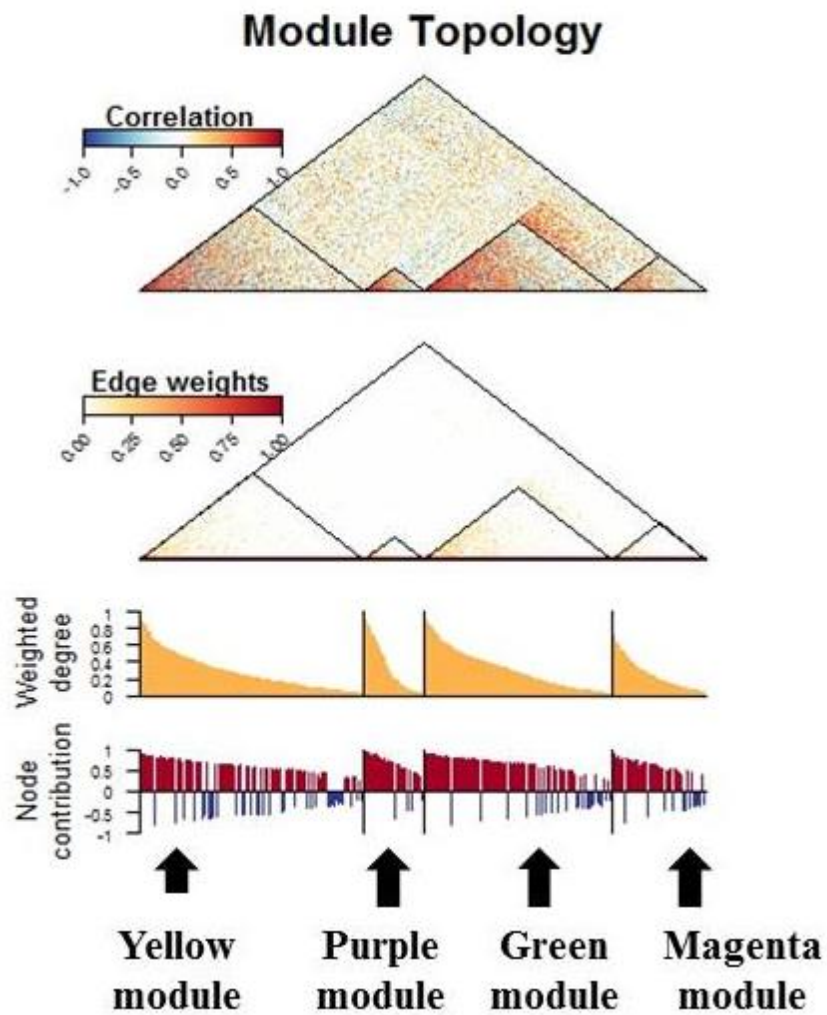

46

47

48 **Figure S5. Scatter plot of module eigengenes in the blue module (childhood**  
49 **asthmatics-specific gene module)**

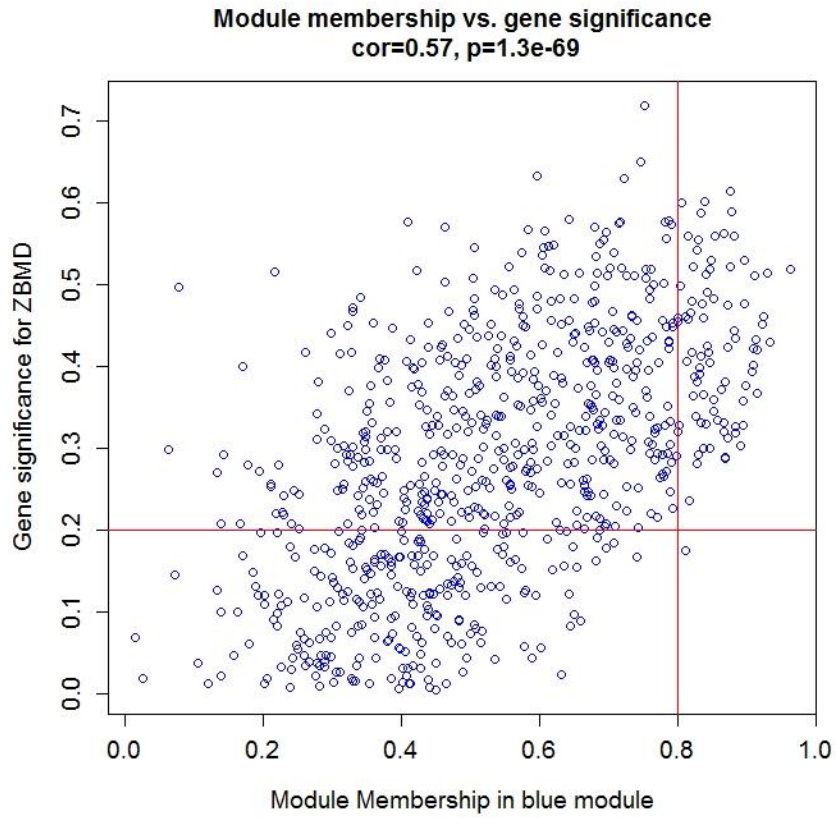

50

51 Hub genes are located at the right and upper quadrant.

52

53 **Table S1. Preservation statistics and P values of modules identified in gene expression profiles of Sham-treated immortalized B**  
 54 **cells from childhood asthmatics in gene expression profiles of Sham-treated peripheral mononuclear cell from adult asthmatics**

|                   | <b>Module</b> | <b>avg.weight</b> | <b>coherence</b> | <b>cor.cor</b> | <b>cor.degree</b> | <b>cor.contrib</b> | <b>avg.cor</b> | <b>avg.contrib</b> |
|-------------------|---------------|-------------------|------------------|----------------|-------------------|--------------------|----------------|--------------------|
|                   | Turquoise     | 0.3189273         | 0.2815515        | 0.10167908     | 0.232922271       | 0.302193872        | 0.023312781    | 0.130860688        |
| <b>Statistics</b> | Magenta       | 0.3019563         | 0.2635123        | 0.17010856     | 0.184381214       | 0.372697861        | 0.09403571     | 0.316896154        |
|                   | Purple        | 0.2611963         | 0.2256738        | -0.02868263    | 0.021443337       | -0.188416992       | 0.008446526    | 0.055997275        |
|                   | Turquoise     | 0.00009999        | 0.00049995       | 0.00009999     | 0.00009999        | 0.00009999         | 0.00009999     | 0.00009999         |
| <b>P values</b>   | Magenta       | 0.00009999        | 0.00009999       | 0.00009999     | 0.0059994         | 0.00009999         | 0.00009999     | 0.00009999         |
|                   | Purple        | 0.00219978        | 0.00009999       | 0.00009999     | 0.00009999        | 0.00009999         | 0.00009999     | 0.00009999         |

55  
 56 Columns correspond to seven module preservation statistics defined by the “NetRep” package and P values are permutation P values.

57 'avg.weight' measures the average magnitude of edge weights in the test dataset, that is, how connected nodes in the module are to each  
 58 other on average.

59 'coherence' measures the proportion of variance in the module data explained by the module's summary profile vector in the test dataset.

60 'cor.cor' measures the concordance of the correlation structure, that is, how similar the correlation heatmaps are between the two  
61 datasets.

62 'cor.degree' measures the concordance of the weighted degree of nodes between the two datasets, that is, whether the nodes that are most  
63 strongly connected in the discovery dataset remain the most strongly connected in the test dataset.

64 'cor.contrib' measures the concordance of the node contribution between the two datasets. This measures whether the module's summary  
65 profile summarizes the data in the same way in both datasets.

66 'avg.cor' measures the average magnitude of the correlation coefficients of the module in the test dataset, that is, how tightly correlated  
67 the module is on average in the test dataset. This score is penalized where the correlation coefficients change in sign between the two  
68 datasets.

69 'avg.contrib' measures the average magnitude of the node contribution in the test dataset. This is a measure of how coherent the data is in  
70 the test dataset. This score is penalized where the node contribution changes in sign between the two datasets, for example, where a gene  
71 is differentially expressed between the two datasets.

72



73 **Table S2. Membership genes of the bone mineral density Z score-associated**  
74 **common module**

| Gene            | Dexamethasone-responsiveness <sup>†</sup> |             | Cellular metabolic process gene <sup>‡</sup> |
|-----------------|-------------------------------------------|-------------|----------------------------------------------|
|                 | log2 fold change                          | P value     |                                              |
| <b>ARMC5</b>    | -0.0380249                                | 0.5828633   | No                                           |
| <b>ATP2A2</b>   | 0.4167439                                 | 0.004790925 | No                                           |
| <b>CCNK</b>     | -0.03142452                               | 0.8246246   | Yes                                          |
| <b>CREBBP</b>   | 0.3673004                                 | 0.01933958  | Yes                                          |
| <b>EP300</b>    | 0.1895247                                 | 0.04375724  | Yes                                          |
| <b>EP400</b>    | 0.08339024                                | 0.4198441   | Yes                                          |
| <b>GTF3C1</b>   | -0.09396902                               | 0.3400058   | Yes                                          |
| <b>IPO13</b>    | -0.216802                                 | 0.03394458  | Yes                                          |
| <b>MTF1</b>     | 0.09902032                                | 0.2934905   | Yes                                          |
| <b>NOL8</b>     | 0.4393377                                 | 0.004976667 | Yes                                          |
| <b>NUP188</b>   | 0.2586276                                 | 0.03014498  | Yes                                          |
| <b>PCF11</b>    | 0.363114                                  | 0.01749985  | Yes                                          |
| <b>RFX5</b>     | -0.7230053                                | 4.46E-05    | Yes                                          |
| <b>SDAD1</b>    | -0.000207901                              | 0.9989959   | No                                           |
| <b>SETD1A</b>   | 0.05012735                                | 0.6606172   | Yes                                          |
| <b>SLC25A22</b> | -0.2194058                                | 0.03049449  | Yes                                          |
| <b>UBAP2L</b>   | 0.07363605                                | 0.6235542   | Yes                                          |
| <b>WDR59</b>    | 0.2273785                                 | 0.1046839   | No                                           |
| ACTR6           | 0.1109978                                 | 0.4389578   | No                                           |
| AES             | -0.02050432                               | 0.898471    | Yes                                          |
| AHCTF1          | 0.3730726                                 | 0.004460191 | Yes                                          |
| AP3D1           | -0.2383877                                | 0.08269878  | No                                           |
| API5            | -0.1081276                                | 0.4565956   | No                                           |
| ARHGEF2         | -0.009367307                              | 0.9545875   | Yes                                          |
| ARHGEF7         | 0.173763                                  | 0.1845487   | No                                           |

|         |             |             |     |
|---------|-------------|-------------|-----|
| ASCC1   | 0.4998325   | 0.002954352 | Yes |
| ATN1    | 0.1217302   | 0.1737577   | Yes |
| ATP5H   | 0.07525412  | 0.6188122   | Yes |
| BASP1   | -0.176706   | 0.2633279   | Yes |
| BCAR3   | -0.05367788 | 0.7422675   | Yes |
| BCKDHB  | -0.1942593  | 0.09301026  | Yes |
| BRMS1L  | 0.1039899   | 0.4509514   | Yes |
| BSDC1   | 0.09092808  | 0.551337    | No  |
| BST2    | -0.490934   | 0.06802809  | No  |
| CA2     | -0.06422838 | 0.2791562   | Yes |
| CAPG    | -0.6143357  | 0.000103104 | No  |
| CASC3   | 0.1625195   | 0.1721365   | Yes |
| CDO1    | 1.829144    | 3.19E-07    | Yes |
| CENPA   | -0.08207925 | 0.4387936   | No  |
| CEP164  | 0.2432321   | 0.01370791  | Yes |
| CERK    | 0.1343028   | 0.4278494   | Yes |
| CH25H   | -1.866276   | 1.45E-10    | Yes |
| CHD9    | 0.1257607   | 0.3960325   | Yes |
| CHFR    | -0.2125413  | 0.1557228   | Yes |
| CHPF    | -0.1314065  | 0.3735946   | Yes |
| CHST4   | 0.01558844  | 0.5488532   | Yes |
| CIAPIN1 | -0.07150332 | 0.5730652   | Yes |
| CLPTM1  | 0.2432343   | 0.1278978   | No  |
| CLYBL   | 0.008894603 | 0.754284    | No  |
| CNOT3   | 0.0546751   | 0.4603973   | Yes |
| CNTNAP1 | -1.238708   | 6.13E-08    | Yes |
| COQ3    | -0.09855938 | 0.3535073   | Yes |
| CPS1    | 0.2290268   | 0.1825634   | Yes |
| DAAM1   | -0.2430557  | 0.03356354  | No  |
| DDX18   | 0.1436745   | 0.3516404   | Yes |
| DHPS    | 0.1440036   | 0.2489465   | Yes |

|          |              |             |     |
|----------|--------------|-------------|-----|
| DHX16    | 0.3218946    | 0.02772507  | Yes |
| DMWD     | 0.194658     | 0.1047469   | Yes |
| DNAJB11  | -0.5242841   | 0.01551282  | No  |
| DNASE1L3 | -0.01143487  | 0.6727044   | No  |
| DPAGT1   | 0.04309813   | 0.7684001   | Yes |
| DPP8     | -0.06523132  | 0.6316888   | No  |
| DTX3L    | 0.01904233   | 0.8253489   | Yes |
| DUT      | 0.1023102    | 0.3912785   | Yes |
| DVL3     | -0.06689867  | 0.6618635   | Yes |
| EFTUD2   | 0.1438144    | 0.2966546   | Yes |
| EHBP1    | -0.08577124  | 0.5814841   | No  |
| EHD4     | -0.5460186   | 0.002778402 | Yes |
| EPM2AIP1 | -0.1359256   | 0.3321766   | Yes |
| ERCC5    | 0.2922338    | 0.06818784  | Yes |
| FAM107B  | -1.156139    | 5.11E-07    | No  |
| FBXO31   | -0.01968161  | 0.8898534   | Yes |
| FBXO32   | 1.570103     | 1.16E-09    | Yes |
| FCRL4    | -0.002745311 | 0.9090735   | No  |
| FEM1C    | -0.1228183   | 0.3769151   | Yes |
| GAL3ST4  | -0.2513723   | 0.09192143  | Yes |
| GALNT11  | -0.004808426 | 0.9765335   | Yes |
| GMDS     | -0.5953401   | 0.001554946 | Yes |
| GMIP     | -0.1988042   | 0.03464187  | No  |
| GPAM     | 0.06356907   | 0.5585172   | Yes |
| GPR63    | -0.01718044  | 0.5493149   | No  |
| GPSM3    | -0.02879238  | 0.4124842   | No  |
| GRWD1    | -0.02176666  | 0.8649613   | Yes |
| HDHD3    | 0.05072435   | 0.5058554   | No  |
| HECW2    | -1.336751    | 3.99E-09    | Yes |
| HMOX1    | -0.4796912   | 0.02672771  | Yes |
| HSD17B4  | -0.06758181  | 0.6420411   | Yes |

|         |             |             |     |
|---------|-------------|-------------|-----|
| HSD17B8 | 0.1427008   | 0.1871824   | Yes |
| IFITM1  | -0.4755904  | 0.08607455  | No  |
| IL12RB2 | 0.002337138 | 0.9275426   | Yes |
| ILF3    | -0.3373229  | 0.01956755  | Yes |
| IMMP2L  | 0.4759356   | 0.007211556 | Yes |
| IMP4    | 0.2827311   | 0.06226788  | Yes |
| JAM3    | -0.27854    | 0.07875547  | No  |
| LCMT2   | -0.2105214  | 0.06002147  | Yes |
| LMCD1   | -0.05090523 | 0.8205146   | Yes |
| LRG1    | -0.0712328  | 0.1019569   | No  |
| LRMP    | -0.05461915 | 0.1096815   | No  |
| LSS     | 0.07077058  | 0.365493    | No  |
| LTBR    | 0.4600118   | 0.003588852 | Yes |
| LTV1    | 0.03768826  | 0.7911137   | Yes |
| LYSMD2  | -0.2976713  | 0.04295053  | No  |
| MAP3K11 | -0.01176198 | 0.8706559   | Yes |
| MAP3K9  | 0.03044987  | 0.3342286   | Yes |
| MBTPS1  | -0.05638059 | 0.6717802   | No  |
| MCCC1   | 1.095814    | 9.51E-07    | Yes |
| MGRN1   | -0.3428809  | 0.01200801  | Yes |
| MIF4GD  | 0.09404469  | 0.4455904   | Yes |
| MKNK1   | 0.1592128   | 0.2525494   | Yes |
| MLKL    | 0.2149509   | 0.1116549   | Yes |
| MNT     | 0.3214067   | 0.02800837  | Yes |
| MRPL13  | -0.382671   | 0.02169304  | Yes |
| MRPL21  | 0.1453495   | 0.3361507   | Yes |
| MYO9B   | -0.2780479  | 0.01883349  | No  |
| NANOS1  | -0.00412782 | 0.9115378   | Yes |
| NDUFAF1 | 0.1486753   | 0.2690561   | Yes |
| NETO2   | -1.414598   | 2.99E-07    | No  |
| NFE2L1  | 0.3434404   | 0.02369207  | Yes |

|         |             |             |     |
|---------|-------------|-------------|-----|
| NRIP1   | 0.2002312   | 0.1868392   | Yes |
| OGFRL1  | -0.01813634 | 0.71452     | No  |
| OPA1    | 0.01489544  | 0.8911344   | Yes |
| OSBPL7  | -0.1845357  | 0.06651421  | Yes |
| PA2G4   | 0.1778768   | 0.1859495   | Yes |
| PAK1IP1 | -0.2853597  | 0.04565006  | No  |
| PAN3    | 0.1796872   | 0.1842327   | Yes |
| PARP10  | -0.257122   | 0.03600866  | Yes |
| PDCD11  | 0.07384745  | 0.6243775   | Yes |
| PDPR    | 0.1655366   | 0.2052807   | Yes |
| PHF21A  | 0.05324777  | 0.7462746   | Yes |
| PITPNM1 | -0.04207103 | 0.7754115   | Yes |
| PLCL2   | 0.000405947 | 0.9969239   | Yes |
| PMM1    | 0.2566175   | 0.08698935  | Yes |
| POLM    | 0.1265262   | 0.1672821   | Yes |
| POLR1B  | 0.1015813   | 0.03515111  | Yes |
| POMC    | -0.06832727 | 0.1778132   | Yes |
| POP1    | -0.1296368  | 0.02369774  | Yes |
| PPAT    | 0.02648512  | 0.8125248   | Yes |
| PPP1R10 | 0.05345218  | 0.5740182   | No  |
| PRPF4   | -0.01731237 | 0.8968255   | Yes |
| PSMD1   | -0.4296974  | 0.009754371 | Yes |
| PSME3   | -0.2313385  | 0.1277027   | Yes |
| PSRC1   | 0.2598794   | 0.0647151   | Yes |
| PTDSS2  | 0.04938412  | 0.6610378   | Yes |
| PURB    | 0.1180083   | 0.45575     | Yes |
| PYGO2   | 0.00981776  | 0.914171    | Yes |
| RAC2    | -0.6051047  | 0.003722524 | Yes |
| RAF1    | 0.8533151   | 1.33E-06    | Yes |
| RASL11A | 1.193431    | 5.19E-11    | Yes |
| RAVER1  | -0.1529538  | 0.2343628   | Yes |

|          |              |             |     |
|----------|--------------|-------------|-----|
| RFNG     | -0.1386487   | 0.2927876   | No  |
| RNF10    | -0.1178786   | 0.2626089   | Yes |
| RPS29    | 0.02998606   | 0.6658347   | Yes |
| SEMA4D   | -0.01229191  | 0.7049854   | Yes |
| SF3A1    | 0.335535     | 0.001977599 | Yes |
| SH3BP1   | -0.08612601  | 0.006560336 | No  |
| SLC16A9  | -0.3364131   | 1.73E-05    | Yes |
| SLC19A1  | 0.0235068    | 0.5599273   | Yes |
| SLC1A1   | -0.2268915   | 0.05093345  | No  |
| SLC39A14 | 0.2253844    | 0.1696513   | No  |
| SLC7A6   | 0.992774     | 5.26E-07    | Yes |
| SLC8A3   | 0.04694271   | 0.1385412   | No  |
| SMG7     | 0.02756055   | 0.2155805   | Yes |
| SMPD1    | -0.3247134   | 0.06939667  | Yes |
| SMYD2    | 0.04870574   | 0.7333661   | Yes |
| SNCA     | 0.03009542   | 0.2019071   | Yes |
| SNRPF    | -0.1208207   | 0.4824207   | Yes |
| SOD2     | 0.9655425    | 7.39E-06    | Yes |
| SPTAN1   | -0.09118875  | 0.5709116   | Yes |
| SRRM1    | -0.1024942   | 0.4354799   | Yes |
| STAG3    | 0.02768771   | 0.3880839   | No  |
| STXBP2   | -0.09626516  | 0.003201894 | No  |
| SUSD3    | -0.03923035  | 0.1108457   | No  |
| SWAP70   | 0.6496999    | 0.000412843 | Yes |
| SYK      | -0.005101204 | 0.8340204   | Yes |
| TBC1D17  | 0.1752784    | 0.05667533  | Yes |
| TBK1     | 0.04910851   | 0.7368423   | Yes |
| TCFL5    | -0.1226683   | 0.3817121   | Yes |
| TIFA     | -0.003374418 | 0.9328039   | No  |
| TMCC3    | 0.03613917   | 0.1714005   | No  |
| TP53INP1 | -0.003103256 | 0.9855975   | Yes |

|         |             |             |     |
|---------|-------------|-------------|-----|
| TRAPPC1 | -0.2654978  | 0.07782754  | No  |
| TRIB1   | 0.1084032   | 0.5323953   | Yes |
| TRIM33  | 0.1115901   | 0.4216781   | Yes |
| TTYH3   | -0.8561338  | 1.19E-07    | No  |
| UBE2E1  | 0.2748404   | 0.08355346  | Yes |
| UPF2    | 0.4067564   | 0.005752861 | Yes |
| VHL     | 0.1119677   | 0.4338542   | Yes |
| VPS37B  | -0.03042062 | 0.7952246   | Yes |
| WDR36   | -0.1196588  | 0.3353938   | Yes |
| WDR41   | -0.3937136  | 0.021583    | No  |
| XAB2    | 0.4018402   | 0.008209929 | Yes |
| YEATS2  | -0.02515252 | 0.8630598   | Yes |
| ZBED4   | -0.1685489  | 0.07611387  | Yes |
| ZBTB9   | -0.1087732  | 0.2894304   | Yes |
| ZCCHC11 | 0.6636235   | 0.000217712 | Yes |
| ZHX1    | -0.4054209  | 0.01785924  | Yes |
| ZNF143  | -0.02376938 | 0.8362303   | Yes |
| ZNF451  | -0.03834851 | 0.16816     | Yes |
| ZNF622  | 0.762305    | 0.000111203 | Yes |

---

75 Bold denotes hub genes, <sup>†</sup>Results from GSE21727, <sup>‡</sup>Enriched pathway identified in this  
76 study

77 **Table S3. Preservation statistics and P values of modules identified in gene expression profiles of Sham-treated immortalized B**  
78 **cells in gene expression profiles of Dex-treated immortalized B cells from childhood asthmatics**

79

|                   | <b>Module</b> | <b>avg.weight</b> | <b>coherence</b> | <b>cor.cor</b> | <b>cor.degree</b> | <b>cor.contrib</b> | <b>avg.cor</b> | <b>avg.contrib</b> |
|-------------------|---------------|-------------------|------------------|----------------|-------------------|--------------------|----------------|--------------------|
| <b>Statistics</b> | Turquoise     | 0.04480772        | 0.3939333        | 0.9084948      | 0.9362422         | 0.9700504          | 0.3305905      | 0.569255           |
|                   | Blue          | 0.01745769        | 0.2799837        | 0.8738084      | 0.9297415         | 0.9748477          | 0.2421161      | 0.4773045          |
|                   | Brown         | 0.0190389         | 0.2947596        | 0.8656649      | 0.8930164         | 0.9594337          | 0.2497806      | 0.4839285          |
|                   | Yellow        | 0.03345755        | 0.384043         | 0.8976904      | 0.8185916         | 0.9632477          | 0.3312046      | 0.5726935          |
|                   | Green         | 0.03303415        | 0.3537517        | 0.869299       | 0.8185485         | 0.9455638          | 0.3061676      | 0.5390105          |
|                   | Red           | 0.0209518         | 0.3138139        | 0.8614475      | 0.779286          | 0.9602717          | 0.2765148      | 0.5203651          |
|                   | Black         | 0.02336877        | 0.327688         | 0.9012397      | 0.8693276         | 0.9762253          | 0.2929021      | 0.5329678          |
|                   | Pink          | 0.02503431        | 0.3321562        | 0.8715029      | 0.8392627         | 0.9657686          | 0.2952158      | 0.5396827          |
|                   | Magenta       | 0.01338425        | 0.2549678        | 0.8052235      | 0.6810665         | 0.9514463          | 0.2283777      | 0.4711403          |
|                   | Purple        | 0.07344489        | 0.437857         | 0.8687456      | 0.9264696         | 0.9230179          | 0.3536952      | 0.5899504          |



|                 |           |            |            |            |            |            |            |            |
|-----------------|-----------|------------|------------|------------|------------|------------|------------|------------|
| <b>P values</b> | Turquoise | 0.00009999 | 0.00009999 | 0.00009999 | 0.00009999 | 0.00009999 | 0.00009999 | 0.00009999 |
|                 | Blue      | 0.00009999 | 0.00009999 | 0.00009999 | 0.00009999 | 0.00009999 | 0.00009999 | 0.00009999 |
|                 | Brown     | 0.00009999 | 0.00009999 | 0.00009999 | 0.00009999 | 0.00009999 | 0.00009999 | 0.00009999 |
|                 | Yellow    | 0.00009999 | 0.00009999 | 0.00009999 | 0.00009999 | 0.00009999 | 0.00009999 | 0.00009999 |
|                 | Green     | 0.00009999 | 0.00009999 | 0.00009999 | 0.00009999 | 0.00009999 | 0.00009999 | 0.00009999 |
|                 | Red       | 0.00009999 | 0.00009999 | 0.00009999 | 0.00009999 | 0.00009999 | 0.00009999 | 0.00009999 |
|                 | Black     | 0.00009999 | 0.00009999 | 0.00009999 | 0.00009999 | 0.00009999 | 0.00009999 | 0.00009999 |
|                 | Pink      | 0.00009999 | 0.00009999 | 0.00009999 | 0.00009999 | 0.00009999 | 0.00009999 | 0.00009999 |
|                 | Magenta   | 0.09609039 | 0.00029997 | 0.00009999 | 0.00009999 | 0.00009999 | 0.00009999 | 0.00009999 |
|                 | Purple    | 0.00009999 | 0.00009999 | 0.00009999 | 0.00009999 | 0.00009999 | 0.00009999 | 0.00009999 |

---

81 **Table S4. The top-200 SNPs obtained from previous GWAS study**

| <b>SNP</b> | <b>P value</b> | <b>SNP</b> | <b>P value</b> | <b>SNP</b> | <b>P value</b> | <b>SNP</b> | <b>P value</b> | <b>SNP</b> | <b>P value</b> |
|------------|----------------|------------|----------------|------------|----------------|------------|----------------|------------|----------------|
| rs7003550  | 1.46E-08       | rs236113   | 3.43E-05       | rs2346008  | 8.66E-05       | rs6678151  | 0.0001397      | rs6493265  | 0.0001891      |
| rs9896933  | 3.15E-08       | rs869697   | 3.66E-05       | rs1369351  | 8.76E-05       | rs303006   | 0.0001414      | rs16940375 | 0.0001891      |
| rs7599706  | 3.98E-08       | rs11149155 | 3.90E-05       | rs2273866  | 8.85E-05       | rs6572555  | 0.0001443      | rs12520537 | 0.0001896      |
| rs12447718 | 4.26E-08       | rs1209633  | 4.02E-05       | rs17040590 | 8.88E-05       | rs10262486 | 0.0001445      | rs17015512 | 0.0001901      |
| rs4368243  | 6.35E-08       | rs1376478  | 4.11E-05       | rs9831609  | 8.90E-05       | rs303000   | 0.0001472      | rs2825581  | 0.0001906      |
| rs2316527  | 7.63E-08       | rs4837698  | 4.13E-05       | rs2824280  | 9.37E-05       | rs4143188  | 0.0001483      | rs1435218  | 0.0001909      |
| rs4484658  | 8.09E-08       | rs2840945  | 4.23E-05       | rs7212240  | 9.68E-05       | rs4480073  | 0.0001502      | rs7689090  | 0.0001921      |
| rs7506840  | 8.95E-08       | rs4945688  | 4.36E-05       | rs1208209  | 9.74E-05       | rs6500586  | 0.0001529      | rs715693   | 0.0001924      |
| rs10485681 | 9.91E-08       | rs10926977 | 4.44E-05       | rs6428587  | 9.86E-05       | rs12880735 | 0.0001535      | rs4420519  | 0.0001928      |
| rs3756612  | 1.94E-06       | rs226313   | 4.53E-05       | rs2825560  | 9.93E-05       | rs11700399 | 0.0001544      | rs2281169  | 0.0001955      |
| rs12149765 | 2.09E-06       | rs10511185 | 4.54E-05       | rs939533   | 9.95E-05       | rs1927731  | 0.0001556      | rs17153785 | 0.0001963      |
| rs10251582 | 4.58E-06       | rs2048920  | 4.68E-05       | rs12101676 | 9.95E-05       | rs7403455  | 0.0001556      | rs889104   | 0.0001969      |
| rs2275732  | 4.67E-06       | rs9341793  | 4.70E-05       | rs4957696  | 9.97E-05       | rs6951422  | 0.0001562      | rs3745788  | 0.0001972      |
| rs7818862  | 5.30E-06       | rs4913287  | 4.79E-05       | rs7587023  | 0.000101       | rs1550948  | 0.0001573      | rs9572552  | 0.0001976      |
| rs12287409 | 6.13E-06       | rs2572283  | 4.98E-05       | rs10841528 | 0.0001016      | rs220612   | 0.000159       | rs12539392 | 0.0001989      |
| rs7930174  | 6.13E-06       | rs7139901  | 5.16E-05       | rs8111710  | 0.0001022      | rs1494023  | 0.00016        | rs2099613  | 0.0001996      |
| rs962963   | 7.93E-06       | rs1945503  | 5.16E-05       | rs17608067 | 0.0001023      | rs242412   | 0.0001601      | rs242405   | 0.0002001      |

|            |          |            |          |            |           |            |           |            |           |
|------------|----------|------------|----------|------------|-----------|------------|-----------|------------|-----------|
| rs2187331  | 8.03E-06 | rs12118850 | 5.30E-05 | rs6758317  | 0.0001025 | rs136070   | 0.0001605 | rs6930328  | 0.0002002 |
| rs9473350  | 1.04E-05 | rs764251   | 5.46E-05 | rs6591350  | 0.0001031 | rs17014050 | 0.0001645 | rs763853   | 0.0002003 |
| rs1911254  | 1.37E-05 | rs9647406  | 5.52E-05 | rs1782322  | 0.0001047 | rs2030737  | 0.0001671 | rs17094058 | 0.0002026 |
| rs7822757  | 1.38E-05 | rs12232191 | 5.65E-05 | rs10801804 | 0.0001062 | rs10087773 | 0.0001676 | rs1956108  | 0.0002039 |
| rs6602747  | 1.47E-05 | rs4786860  | 5.80E-05 | rs4495950  | 0.0001063 | rs386790   | 0.0001683 | rs6772123  | 0.00021   |
| rs739994   | 1.70E-05 | rs966935   | 5.83E-05 | rs10464035 | 0.0001071 | rs10243420 | 0.0001686 | rs12918809 | 0.00021   |
| rs770236   | 1.78E-05 | rs1028458  | 6.15E-05 | rs17217760 | 0.0001082 | rs242401   | 0.0001691 | rs1469572  | 0.0002112 |
| rs4853475  | 1.81E-05 | rs2386983  | 6.21E-05 | rs1040151  | 0.0001089 | rs12740041 | 0.00017   | rs281505   | 0.0002129 |
| rs1367685  | 1.82E-05 | rs6845304  | 6.27E-05 | rs675566   | 0.0001103 | rs6023633  | 0.0001707 | rs1462831  | 0.0002134 |
| rs1896950  | 1.90E-05 | rs10514688 | 6.28E-05 | rs2182954  | 0.0001112 | rs6957858  | 0.0001714 | rs2146880  | 0.0002137 |
| rs4886620  | 2.11E-05 | rs9915334  | 6.43E-05 | rs6963373  | 0.0001144 | rs4864471  | 0.0001741 | rs2436634  | 0.0002166 |
| rs1903876  | 2.15E-05 | rs7176566  | 6.48E-05 | rs1126328  | 0.0001168 | rs12639326 | 0.0001746 | rs2814848  | 0.0002173 |
| rs8074277  | 2.20E-05 | rs6771233  | 6.52E-05 | rs220611   | 0.0001196 | rs7835456  | 0.0001748 | rs1996709  | 0.0002176 |
| rs2117906  | 2.21E-05 | rs2824317  | 7.01E-05 | rs10778889 | 0.0001198 | rs10494229 | 0.0001775 | rs2073831  | 0.0002178 |
| rs3743487  | 2.52E-05 | rs1239104  | 7.07E-05 | rs10791993 | 0.0001211 | rs6130139  | 0.0001785 | rs7166898  | 0.0002178 |
| rs7149088  | 2.65E-05 | rs2401035  | 7.19E-05 | rs2001558  | 0.0001217 | rs11252485 | 0.0001794 | rs2825544  | 0.0002179 |
| rs998235   | 2.76E-05 | rs1394551  | 7.41E-05 | rs3810524  | 0.0001245 | rs9856875  | 0.0001795 | rs2347935  | 0.0002196 |
| rs11058317 | 2.78E-05 | rs10257931 | 7.61E-05 | rs2341459  | 0.0001263 | rs11242598 | 0.0001799 | rs7097254  | 0.0002199 |
| rs1011692  | 2.91E-05 | rs12432642 | 7.69E-05 | rs1105274  | 0.0001266 | rs1949929  | 0.0001805 | rs1438182  | 0.0002223 |
| rs7154679  | 2.99E-05 | rs9817986  | 7.78E-05 | rs1385432  | 0.0001275 | rs2732231  | 0.0001816 | rs2930796  | 0.0002225 |

|            |          |            |          |            |           |           |           |            |           |
|------------|----------|------------|----------|------------|-----------|-----------|-----------|------------|-----------|
| rs17678758 | 3.18E-05 | rs4779618  | 7.92E-05 | rs1468627  | 0.0001284 | rs9888659 | 0.0001818 | rs2144800  | 0.0002225 |
| rs4677414  | 3.34E-05 | rs4877971  | 8.11E-05 | rs10801805 | 0.000133  | rs2007888 | 0.0001843 | rs16983718 | 0.0002228 |
| rs236111   | 3.43E-05 | rs10812520 | 8.37E-05 | rs12232511 | 0.0001348 | rs4336567 | 0.0001884 | rs12649285 | 0.0002265 |

---

83 **Table S5. Preservation statistics and P values of modules identified in gene expression profiles of Sham-treated immortalized B**  
 84 **cells in gene expression profiles of Sham-treated osteoblast from GSE21727**

85

|                   | <b>Module</b> | <b>avg.weight</b> | <b>coherence</b> | <b>cor.cor</b> | <b>cor.degree</b> | <b>cor.contrib</b> | <b>avg.cor</b> | <b>avg.contrib</b> |
|-------------------|---------------|-------------------|------------------|----------------|-------------------|--------------------|----------------|--------------------|
| <b>Statistics</b> | Turquoise     | 0.6544096         | 0.6031521        | 0.04222102     | 0.117234467       | 0.12782118         | 0.012455046    | 0.08988802         |
|                   | Blue          | 0.6514467         | 0.5967116        | 0.03307033     | 0.046351508       | 0.11102283         | 0.019290233    | 0.11550161         |
|                   | Brown         | 0.6537856         | 0.603804         | 0.03447525     | 0.00710907        | 0.06099031         | 0.017651138    | 0.06263249         |
|                   | Yellow        | 0.6799488         | 0.6645311        | 0.46249519     | 0.300256852       | 0.73507939         | 0.319278805    | 0.57574776         |
|                   | Green         | 0.6822337         | 0.6677667        | 0.3033763      | 0.253927274       | 0.49400758         | 0.249250918    | 0.50551534         |
|                   | Red           | 0.6781878         | 0.6600332        | 0.32291358     | 0.086556734       | -0.62991583        | 0.212733097    | -0.45032814        |
|                   | Black         | 0.6460818         | 0.5811741        | 0.01554291     | 0.071296112       | 0.04287394         | 0.008792729    | 0.0678776          |
|                   | Pink          | 0.6525093         | 0.6015149        | 0.04848967     | 0.007140164       | 0.19079314         | 0.023572609    | 0.1516882          |
|                   | Magenta       | 0.6917683         | 0.6869658        | 0.29738041     | 0.326949677       | 0.47228733         | 0.238804094    | 0.4903798          |
|                   | Purple        | 0.7006673         | 0.7004956        | 0.28914427     | 0.264062108       | 0.41262065         | 0.350409141    | 0.59139682         |

|                 |           |            |            |            |            |            |            |            |
|-----------------|-----------|------------|------------|------------|------------|------------|------------|------------|
| <b>P values</b> | Turquoise | 0.6520348  | 0.70482952 | 0.00009999 | 0.00009999 | 0.00009999 | 0.00009999 | 0.00089991 |
|                 | Blue      | 0.84531547 | 0.83811619 | 0.00009999 | 0.09829017 | 0.0009999  | 0.00009999 | 0.00049995 |
|                 | Brown     | 0.63973603 | 0.63073693 | 0.00009999 | 0.4279572  | 0.06079392 | 0.00009999 | 0.02569743 |
|                 | Yellow    | 0.00029997 | 0.00029997 | 0.00009999 | 0.00009999 | 0.00009999 | 0.00009999 | 0.00009999 |
|                 | Green     | 0.00039996 | 0.00029997 | 0.00009999 | 0.00009999 | 0.00009999 | 0.00009999 | 0.00009999 |
|                 | Red       | 0.00089991 | 0.00119988 | 0.00009999 | 0.0489951  | 1          | 0.00009999 | 1          |
|                 | Black     | 0.93080692 | 0.92890711 | 0.01449855 | 0.10508949 | 0.2279772  | 0.02959704 | 0.10238976 |
|                 | Pink      | 0.61383862 | 0.64013599 | 0.00059994 | 0.46605339 | 0.0019998  | 0.00449955 | 0.00559944 |
|                 | Magenta   | 0.00059994 | 0.00039996 | 0.00009999 | 0.00009999 | 0.00009999 | 0.00009999 | 0.00009999 |
|                 | Purple    | 0.00209979 | 0.00179982 | 0.00009999 | 0.00139986 | 0.00009999 | 0.00009999 | 0.00009999 |

---

87 **Table S6. Hub genes of the blue module (childhood asthmatics-specific gene**  
 88 **module)**

| Gene    | Gene    | Gene     | Gene     | Gene   |
|---------|---------|----------|----------|--------|
| ZDHHC23 | RSAD1   | CTNNBIP1 | TRAK2    | SGPP1  |
| TRRAP   | PTAFR   | SMARCD1  | TRIP13   | ZNF337 |
| TOB2    | POLR2B  | RBM15    | UBQLN4   | CHKA   |
| CELSR3  | BLM     | CUL1     | NT5E     | SNRK   |
| LRFN4   | PISD    | PAQR3    | SUPT16H  | CCT5   |
| DENND1A | ACAD10  | GART     | CBFB     | SBF1   |
| RAB6A   | PIK3R4  | RICTOR   | KIAA0922 | DLL3   |
| RPS6KA5 | RNPEPL1 | CYLD     | MTAP     | TTLL12 |
| CSE1L   | TRAF5   | GPD1L    | ABCA3    | JSRP1  |
| STAT5B  | FBXO21  | MYL9     | CEBPG    | MYO1D  |
| TFAP4   | PHF10   | TATDN2   | ETV6     | RNH1   |
| PAK2    | BICD2   | DCBLD2   | ZNF562   |        |
| UBE3B   | MESDC1  | ATP1A1   | EXOC6    |        |
| TRIM47  | RASGRP2 | MCM3AP   | MCM6     |        |
| EML4    | TMTC4   | RPS6KB1  | PSME4    |        |
| LMNB2   | ETV4    | ZNF281   | S100A10  |        |
| GANAB   | ACY3    | PRCC     | ACOT4    |        |

89

90 **Table S7. Biological pathways enriched in the blue module (childhood asthmatics-specific gene module)**

| <b>ID</b>  | <b>Name<sup>†</sup></b>                           | <b>Depth<sup>‡</sup></b> | <b>P value<sup>§</sup></b> |
|------------|---------------------------------------------------|--------------------------|----------------------------|
| GO:0051348 | Negative regulation of transferase activity       | 1                        | 0.0112                     |
| GO:0071705 | Nitrogen compound transport                       | 1                        | 0.00577                    |
| GO:0033036 | Macromolecule localization                        | 1                        | 0.000083                   |
| GO:0008104 | Protein localization                              | 2                        | 0.0000187                  |
| GO:0045184 | Establishment of protein localization             | 3                        | 0.00211                    |
| GO:0051641 | Cellular localization                             | 1                        | 0.000000237                |
| GO:0070727 | Cellular macromolecule localization               | 2                        | 0.000166                   |
| GO:0034613 | Cellular protein localization                     | 3                        | 0.000215                   |
| GO:0051649 | Establishment of localization in cell             | 1                        | 0.0000789                  |
| GO:0046907 | Intracellular transport                           | 2                        | 0.000269                   |
| GO:0035556 | Intracellular signal transduction                 | 1                        | 0.0387                     |
| GO:0007249 | I-kappaB kinase/NF-kappaB signaling               | 2                        | 0.00979                    |
| GO:0043122 | Regulation of I-kappaB kinase/NF-kappaB signaling | 1                        | 0.00348                    |
| GO:0008150 | Biological_process                                | 1                        | 5.55E-08                   |
| GO:0071840 | Cellular component organization or biogenesis     | 2                        | 0.00000651                 |
| GO:0044085 | Cellular component biogenesis                     | 3                        | 0.00512                    |
| GO:0002376 | Immune system process                             | 2                        | 0.000014                   |



|            |                                            |   |             |
|------------|--------------------------------------------|---|-------------|
| GO:0044699 | Single-organism process                    | 2 | 0.00000172  |
| GO:0008152 | Metabolic process                          | 2 | 1.17E-08    |
| GO:0044238 | Primary metabolic process                  | 3 | 0.000000726 |
| GO:0009058 | Biosynthetic process                       | 3 | 0.0151      |
| GO:0009056 | Catabolic process                          | 3 | 0.00000161  |
| GO:0071704 | Organic substance metabolic process        | 3 | 0.000000274 |
| GO:0006807 | Nitrogen compound metabolic process        | 3 | 0.0000099   |
| GO:0050896 | Response to stimulus                       | 2 | 0.0025      |
| GO:0042221 | Response to chemical                       | 3 | 0.00178     |
| GO:0009628 | Response to abiotic stimulus               | 3 | 0.00735     |
| GO:0006950 | Response to stress                         | 3 | 0.00000223  |
| GO:0009607 | Response to biotic stimulus                | 3 | 0.0176      |
| GO:0006955 | Immune response                            | 3 | 0.00866     |
| GO:0065007 | Biological regulation                      | 2 | 0.000416    |
| GO:0065009 | Regulation of molecular function           | 3 | 0.00285     |
| GO:0051704 | Multi-organism process                     | 2 | 0.011       |
| GO:0044419 | Interspecies interaction between organisms | 3 | 0.0001      |
| GO:0051707 | Response to other organism                 | 3 | 0.00675     |
| GO:0009987 | Cellular process                           | 2 | 1.15E-10    |
| GO:0044763 | Single-organism cellular process           | 3 | 0.00000227  |

|            |                                                                                     |   |            |
|------------|-------------------------------------------------------------------------------------|---|------------|
| GO:0016043 | Cellular component organization                                                     | 3 | 0.0000855  |
| GO:0044237 | Cellular metabolic process                                                          | 3 | 7.89E-11   |
| GO:0051716 | Cellular response to stimulus                                                       | 3 | 0.00772    |
| GO:0022402 | Cell cycle process                                                                  | 3 | 0.0000554  |
| GO:0050789 | Regulation of biological process                                                    | 2 | 0.000326   |
| GO:0050794 | Regulation of cellular process                                                      | 3 | 0.00472    |
| GO:0019222 | Regulation of metabolic process                                                     | 3 | 0.000388   |
| GO:0048519 | Negative regulation of biological process                                           | 2 | 0.00000102 |
| GO:0048523 | Negative regulation of cellular process                                             | 3 | 0.0000874  |
| GO:0009892 | Negative regulation of metabolic process                                            | 3 | 0.0114     |
| GO:0048518 | Positive regulation of biological process                                           | 2 | 0.00034    |
| GO:0048522 | Positive regulation of cellular process                                             | 3 | 0.0372     |
| GO:0002684 | Positive regulation of immune system process                                        | 3 | 0.00615    |
| GO:1903320 | Regulation of protein modification by small protein conjugation or removal          | 1 | 0.000011   |
| GO:1903322 | Positive regulation of protein modification by small protein conjugation or removal | 2 | 0.0183     |
| GO:0031396 | Regulation of protein ubiquitination                                                | 2 | 0.0000167  |
| GO:0031398 | Positive regulation of protein ubiquitination                                       | 3 | 0.0499     |
| GO:0031400 | Negative regulation of protein modification process                                 | 1 | 0.0136     |
| GO:1903321 | Negative regulation of protein modification by small protein conjugation or removal | 2 | 0.00468    |
| GO:0031397 | Negative regulation of protein ubiquitination                                       | 3 | 0.0016     |

|            |                                                            |   |          |
|------------|------------------------------------------------------------|---|----------|
| GO:0031349 | Positive regulation of defense response                    | 1 | 0.005    |
| GO:0045089 | Positive regulation of innate immune response              | 2 | 0.000201 |
| GO:0002218 | Activation of innate immune response                       | 3 | 0.000223 |
| GO:0010243 | Response to organonitrogen compound                        | 1 | 0.0346   |
| GO:0070646 | Protein modification by small protein removal              | 1 | 0.0202   |
| GO:0016579 | Protein deubiquitination                                   | 2 | 0.00678  |
| GO:0051603 | Proteolysis involved in cellular protein catabolic process | 1 | 0.00416  |
| GO:0019941 | Modification-dependent protein catabolic process           | 2 | 0.0045   |
| GO:0006511 | Ubiquitin-dependent protein catabolic process              | 3 | 0.00729  |
| GO:0002758 | Innate immune response-activating signal transduction      | 1 | 0.000121 |
| GO:0007159 | Leukocyte cell-cell adhesion                               | 1 | 0.000436 |
| GO:1903037 | Regulation of leukocyte cell-cell adhesion                 | 2 | 0.00417  |
| GO:0050863 | Regulation of T cell activation                            | 1 | 0.00408  |
| GO:2001235 | Positive regulation of apoptotic signaling pathway         | 1 | 0.0458   |

---

91 †Gene ontology biological pathway, ‡Only depth 1 ~ 3 were presented, §Benjamini-Hocherg FDR P value

92

93
